# Supplementary material
Source: publisher figshare collection journal article supplement (https://aacr.figshare.com/articles/dataset/_/23782408)

**Supplementary Figure S8- Individual tumor volumes from mice treated  $\pm$  E2.** OvX mice bearing tumors  $\sim 200\text{ mm}^3$  were randomized to treatment  $\pm$  E2 by s.c. pellet. Tumor volumes were serially measured. Each line represents one mouse. Summary data are shown in Fig. 3B.

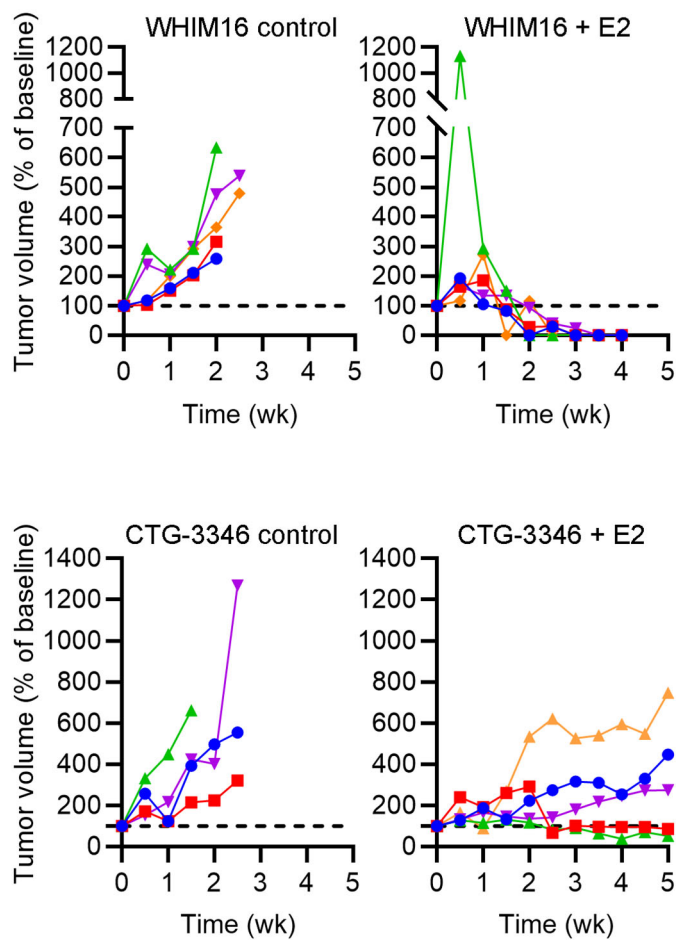

Supplement: Supplementary file 1 [file 41715985]
